# Supplementary material for: Single-Cell Multiomic Approaches Reveal Diverse Labeling of the Nervous System by Common Cre-Drivers
Source: Front Cell Neurosci. 2021 Apr 14;15:648570. doi: 10.3389/fncel.2021.648570 (PMC8079645; doi:10.3389/fncel.2021.648570)
Supplement: Supplementary file 4 [file Table_4.XLSX]

## Sheet: NormalizedCounts
	140E	209C	209E	209F	200A	200B
Pax3	316.686	383.361	426.672	331.904	259.698	260.119
Pax7	5.07509	0.968084	4.72766	4.64201	2.79246	6.04927
Sox10	605.966	1438.57	842.706	735.178	1190.52	235.922
Sox9	1467.72	2323.4	1757.51	1562.04	796.781	744.06
Wnt1	19.2853	1.93617	28.366	27.2718	379.774	229.872
Tubb3	377.587	322.372	390.032	213.532	1324.56	1760.34
Sox1	1.01502	0	7.09149	1.1605	172.201	190.552
	Sox10	Sox10	Wnt1	Wnt1
Sox10	1438.57	842.706	1190.52	235.922	10.4904	9.71889	10.2174	7.88216
Wnt1	1.93617	28.366	379.774	229.872	0.953203	4.82609	8.569	7.84469
Pax3	383.361	426.672	259.698	260.119	8.58256	8.73698	8.02069	8.02303
Pax7	0.968084	4.72766	2.79246	6.04927	-0.0467965	2.24113	1.48153	2.59676
Sox10	1438.57	842.706	1190.52	235.922	10.4904	9.71889	10.2174	7.88216
Sox9	2323.4	1757.51	796.781	744.06	11.182	10.7793	9.63804	9.53928
Tubb3	322.372	390.032	1324.56	1760.34	8.33258	8.60745	10.3713	10.7816
Sox1	0	7.09149	172.201	190.552	-2	2.82609	7.42795	7.57404

## Sheet: neuron v ncc heatmap
	Sox10	Sox10	Wnt1	Wnt1
Wnt1	1.71523	25.0715	332.1	200.964
Sox10	1274.41	744.833	1041.07	206.252
Neurod1	180.957	159.831	158.724	232.695
Neurod4	6.0033	16.7143	82.2111	107.092
Neurog1	34.3046	15.6697	87.0949	109.737
Neurog2	0	6.26788	67.5596	92.5491
Sox1	0	6.26788	150.585	166.588
Atoh1	0	1.04465	31.7449	30.409
Fgf15	36.0198	55.3662	543.733	509.02
Fgf8	11.149	44.9198	373.613	450.846
Onecut2	3.43046	1.04465	118.84	107.092
Olig2	1.71523	2.08929	77.3273	157.333
Sox9	2058.27	1553.39	696.76	650.488
Pax3	339.615	377.117	227.098	227.406
Sox5	334.469	230.867	78.1413	66.1065
Ednrb	736.69	587.091	223.028	239.305
Snai1	100.341	121.179	54.5361	60.818
Snai2	102.056	157.742	53.7221	68.7507
Zeb2	367.059	264.295	100.932	95.1933
Foxd3	153.513	114.911	64.3037	35.6975
Ets1	1076.31	668.573	131.049	80.6499
Myc	741.836	1143.89	500.592	368.874
